# Supplementary material for: A population‐based temporal logic gate for timing and recording chemical events
Source: PubMed Central journal article supplement (PMC5289221; doi:10.15252/msb.20156663), 2016-05-18
Supplement: MSB-12-869-s002.pdf [file MSB-12-869-s002.pdf]

## Expanded View Figures

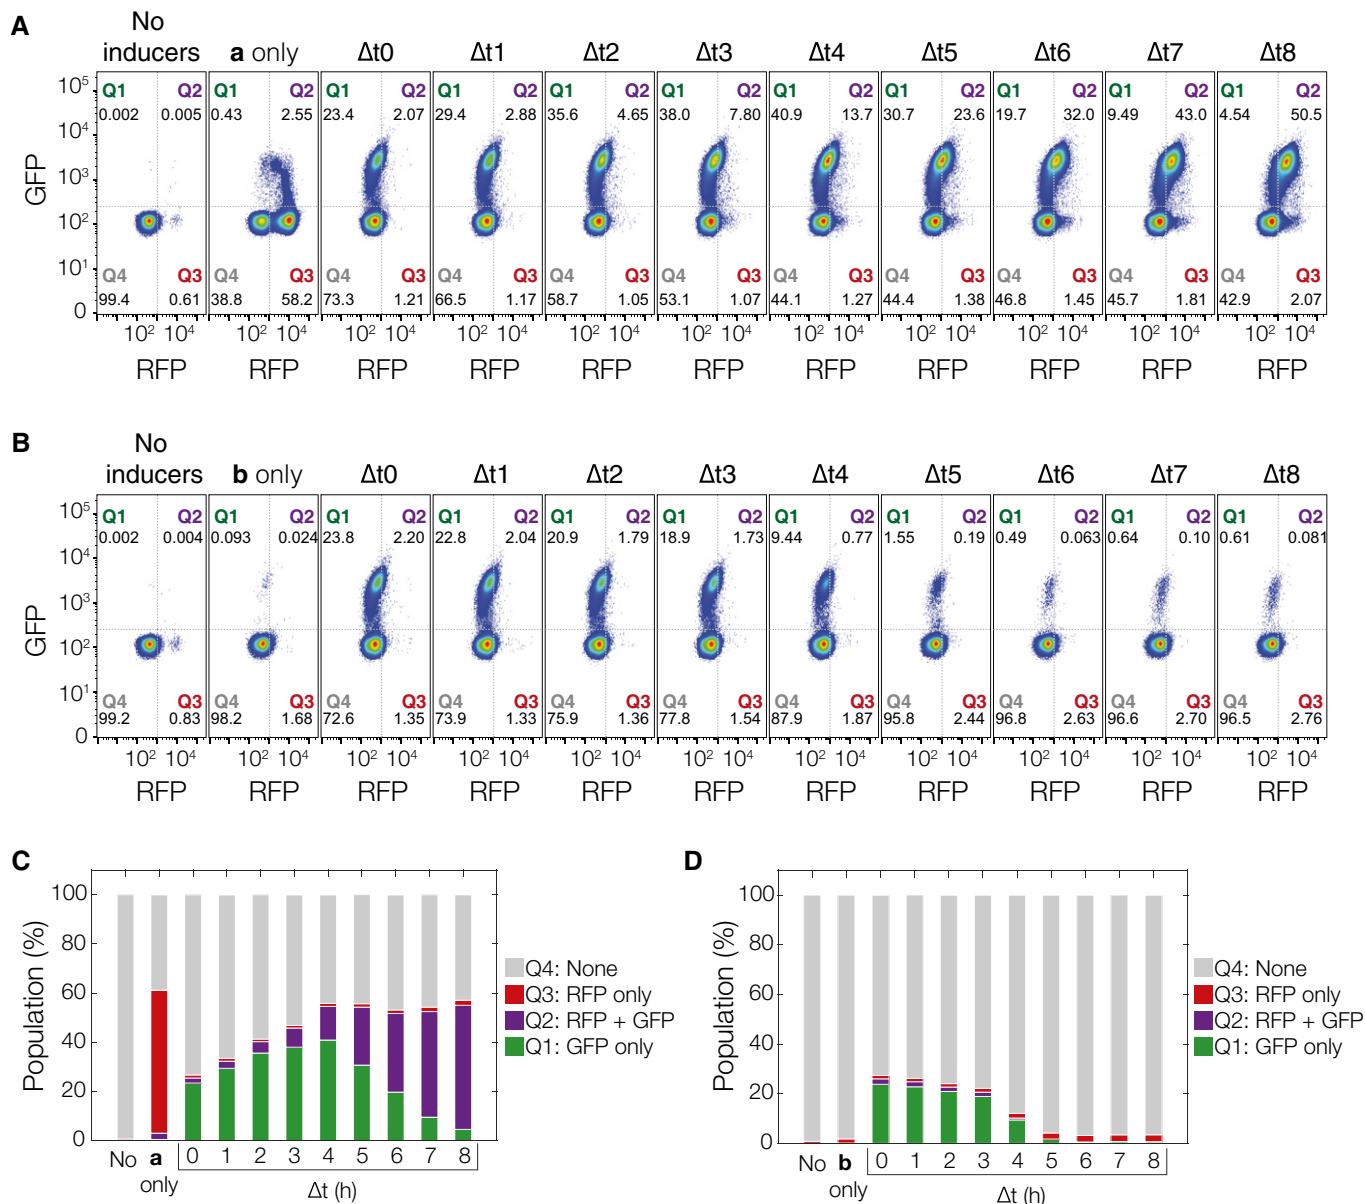

**Figure EV1. Flow cytometry data for varying inducer separation time from  $\Delta t = 0$  to 8 h ( $\sim 10^6$  cells per population).**

The populations are gated by fluorescence into Q1 ( $S_{ab}$ , GFP only), Q2 ( $S_{ab}$ , RFP and GFP), Q3 ( $S_a$ , RFP only), and Q4 ( $S_o$ ,  $S_b$ , non-fluorescent). There is a transitory phase (Q2) in which cells contain both GFP and RFP. This is due to slow dilution of RFP through cell division even after cells have switched to  $S_{ab}$  and begun production of GFP. Cells in Q1 + Q2 are used for the final GFP population fractions in Fig 4C.

A  $E_{ab}$  cell populations plotted by their RFP and GFP expression with increasing  $\Delta t$ . Leaky expression of PBAD-intA can be estimated by looking at Q3 of the *No inducers*, *b only* populations ( $\sim 0.5$ – $2\%$ ). Leaky expression of Ptet-intB can be estimated with Q1 + Q2 fractions of the *a only* population ( $\sim 2$ – $3\%$ ).

B  $E_{ba}$  populations with increasing  $\Delta t$ .

C Population fractions by quadrant for *a then b*,  $E_{ab}$ .

D Population fractions by quadrant for *b then a*,  $E_{ba}$ . Individual flow cytometry histograms can be found in Appendix Figs S8–S10.

Source data are available online for this figure.

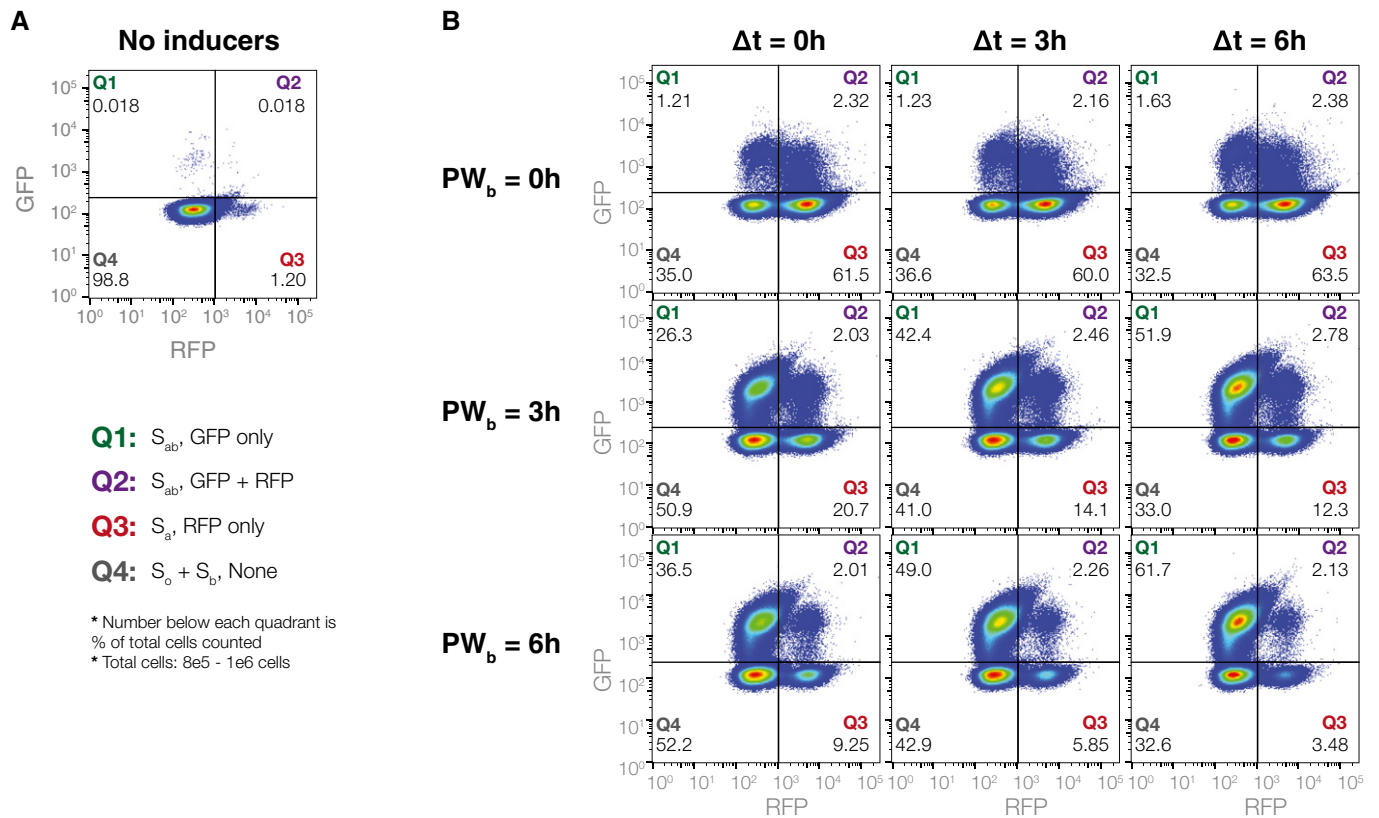

**Figure EV2. Selected flow cytometry panels for Fig 7C populations.**

Cell populations are gated by RFP and GFP fluorescence into quadrants Q1 ( $S_{ab}$ , GFP only), Q2 ( $S_{ab}$ , RFP and GFP), Q3 ( $S_a$ , RFP only), and Q4 ( $S_o$ ,  $S_b$ , non-fluorescent). Percentage of total cells in each quadrant is shown under the quadrant label in each panel.

A Control population not exposed to any inducers. There is minimal leaky expression (1–2%) into Q3 after 36 h of growth.

B Populations for  $PW_b$  and  $\Delta t$  values of 0, 3, and 6 h. For  $PW_b = 0$  h populations, ~60% of the cells switch to  $S_a$  (Q3), with ~3% intB leaky expression going into Q1 and Q2. As  $PW_b$  increases, the  $S_a$  fraction drops from 60% ( $PW_b = 0$  h) to 10–20% ( $PW_b = 3$  h) to less than 10% ( $PW_b = 6$  h). As  $\Delta t$  increases, the percentage of cells in  $S_{ab}$  (Q1) increases from 20–40% ( $\Delta t = 0$  h) to 40–50% ( $\Delta t = 3$  h) to 50–60% ( $\Delta t = 6$  h).  $S_a$  populations (Q3) also drift downwards with increasing  $\Delta t$ , rather than staying constant as predicted in simulation. Lower  $\Delta t$  results in higher  $S_b$  populations, which, combined with  $S_o$  cells, make up Q4. Critically, the percentage of the population expressing both RFP and GFP simultaneously (Q2) is always < 3%. This ensures that RFP is a reliable determinant of  $S_a$  state cells, and subsequently, of  $PW_b$ .

Source data are available online for this figure.
